# Supplementary material for: Detection of Metallothionein in Javanese Medaka (Oryzias javanicus), Using a scFv-Immobilized Protein Chip
Source: MDPI journal article supplement (doi:10.3390/s18041069), 2018-04-02
Supplement: s1 [file s1]

# Detection of a heavy metal exposure biomarker, metallothionein in Javanese medaka (*Oryzias javanicus*) using scFv-immobilized protein chip

Euiyeon Lee <sup>1,†</sup>, Hyunjin Jeon <sup>1,†</sup>, Chungwon Kang <sup>1</sup>, Seonock Woo <sup>2,3</sup>, Seungshic Yum <sup>2,3</sup> and Youngeun Kwon <sup>1,\*</sup>

<sup>1</sup> Department of Biomedical Engineering, Dongguk University, Seoul 04620, Korea; dmldysl@gmail.com, iu8974@gmail.com, ykwon@dongguk.edu

<sup>2</sup> South Sea Environment Research Center, Korea Institute of Ocean Science and Technology (KIOST), Geje 53201, Korea; cwoo@kiost.ac.kr, syum@kiost.ac.kr

<sup>3</sup> Faculty of Marine Environmental Science, University of Science and Technology (UST), Geje 53201, Korea; cwoo@kiost.ac.kr, syum@kiost.ac.kr

† These two authors contributed equally.

\* Correspondence: ykwon@dongguk.edu; Tel.: +82-31-961-5151

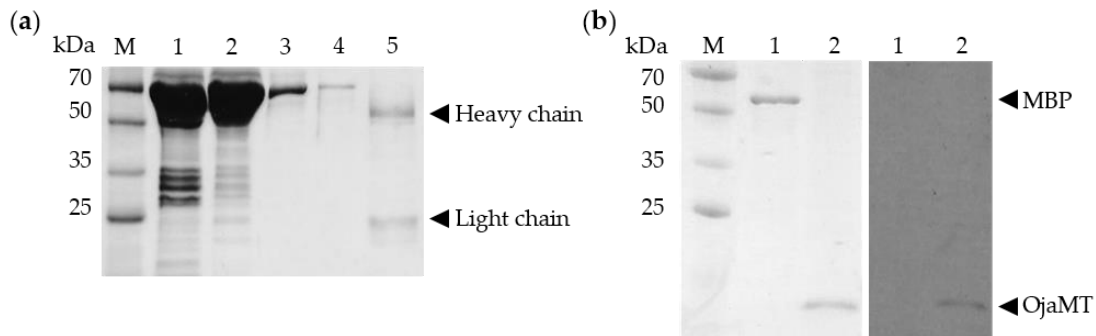

**Figure S1. Production and characterization of anti-OjaMT monoclonal antibody (mAb).** (a) Purification of anti-OjaMT mAb was analyzed by SDS-PAGE. Lane 1, hybridoma media; lane 2, protein G column flow through; lane 3 and 4, wash fraction; lane 5, elution; M, protein weight marker. (b) SDS-PAGE (left) and western blot analysis using the anti-OjaMT mAb as the primary Ab (right). Lane 1, control protein (maltose binding protein, MBP); lane 2, OjaMT; M, protein weight marker.

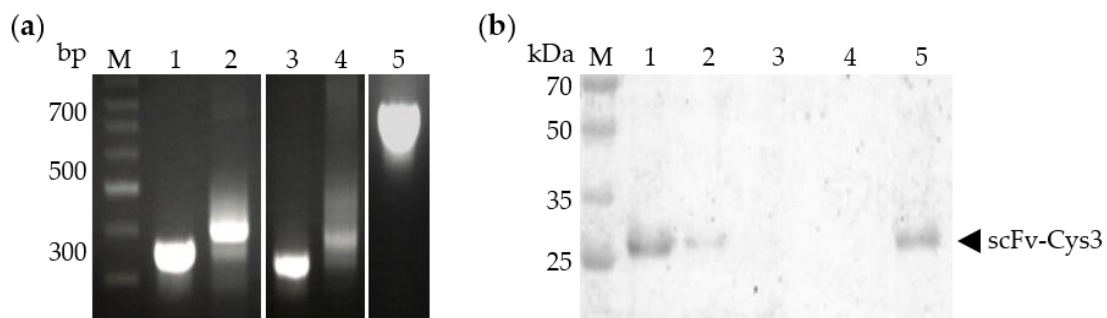

**Figure S2. Preparation of the recombinant anti-OjaMT scFv construct.** (A) The recombinant anti-OjaMT scFv antibody were analyzed by DNA electrophoresis. Lane 1, heavy chain; lane 2, linker assembled heavy chain; lane 3, light chain; lane 4, linker assembled light chain; lane 5, final assembly of recombinant anti-OjaMT scFv constructs; M, DNA ladder. (C) Purification of anti-OjaMT scFv was analyzed by SDS-PAGE. Lane 1, before refolding sample; lane 2, Ni-column flow through; lane 3 and 4, wash fraction; lane 5, the final refolded recombinant anti-OjaMT scFv-Cys3; M, molecular weight marker.

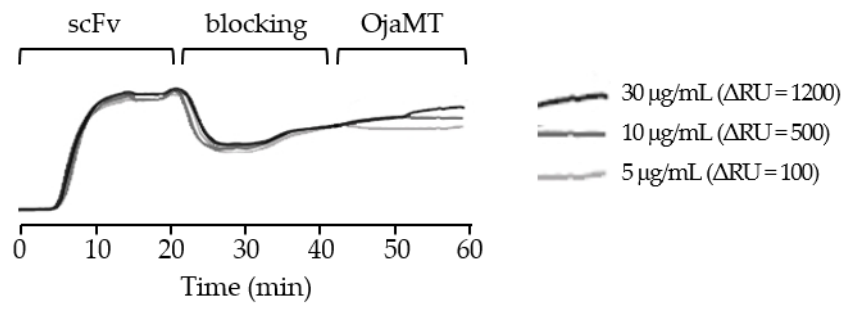

**Figure S3. OjaMT detection using SPR chip immobilized with recombinant anti-OjaMT scFv.** Sensitivity of scFv-immobilized sensor chip was confirmed through the change of RU value after OjaMT was exposed in the concentration range of 5 µg/mL to 30 µg/mL.
